# Supplementary material
Source: PubMed Central journal article supplement (PMC3496184)

Fig. S1

A

Chromosome 2

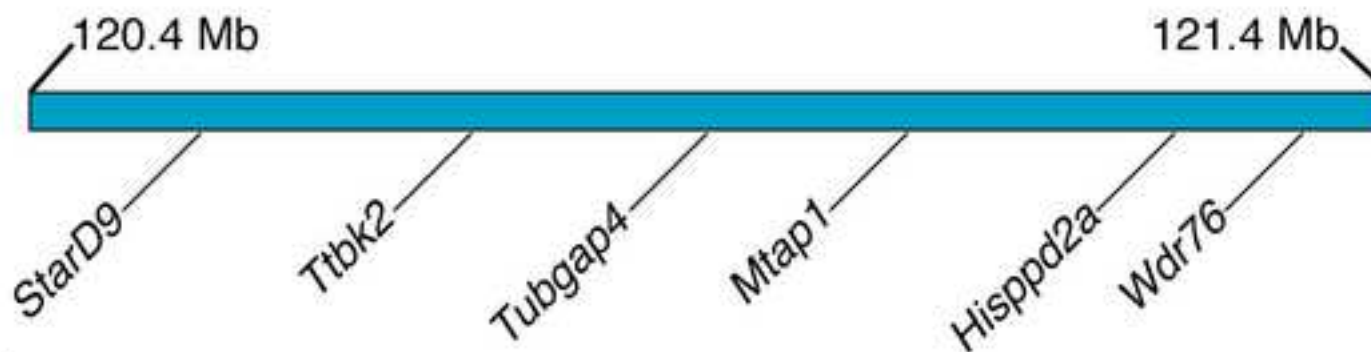

B

TTBK2, Variant 1

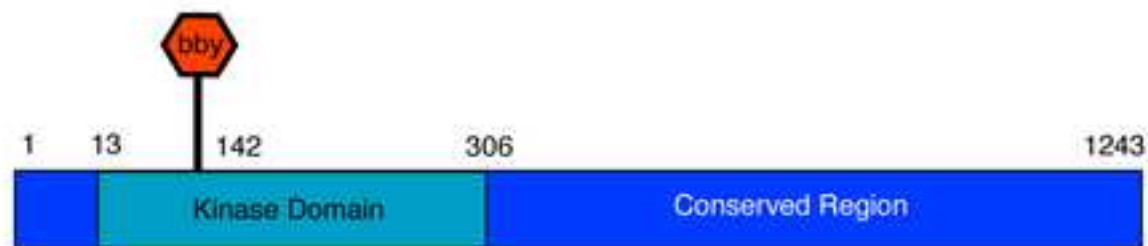

TTBK2, Variant 2

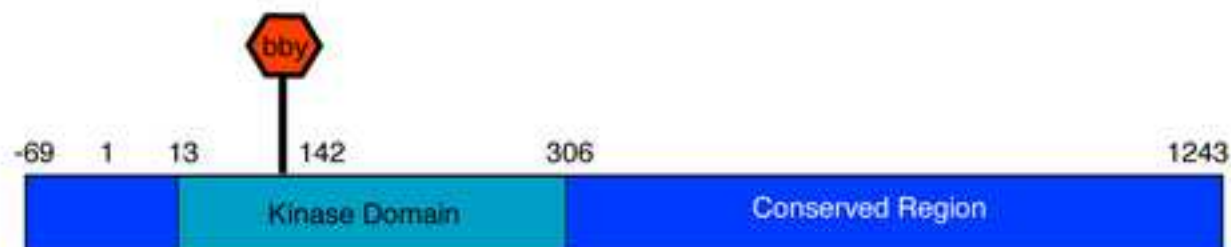

Fig. S2

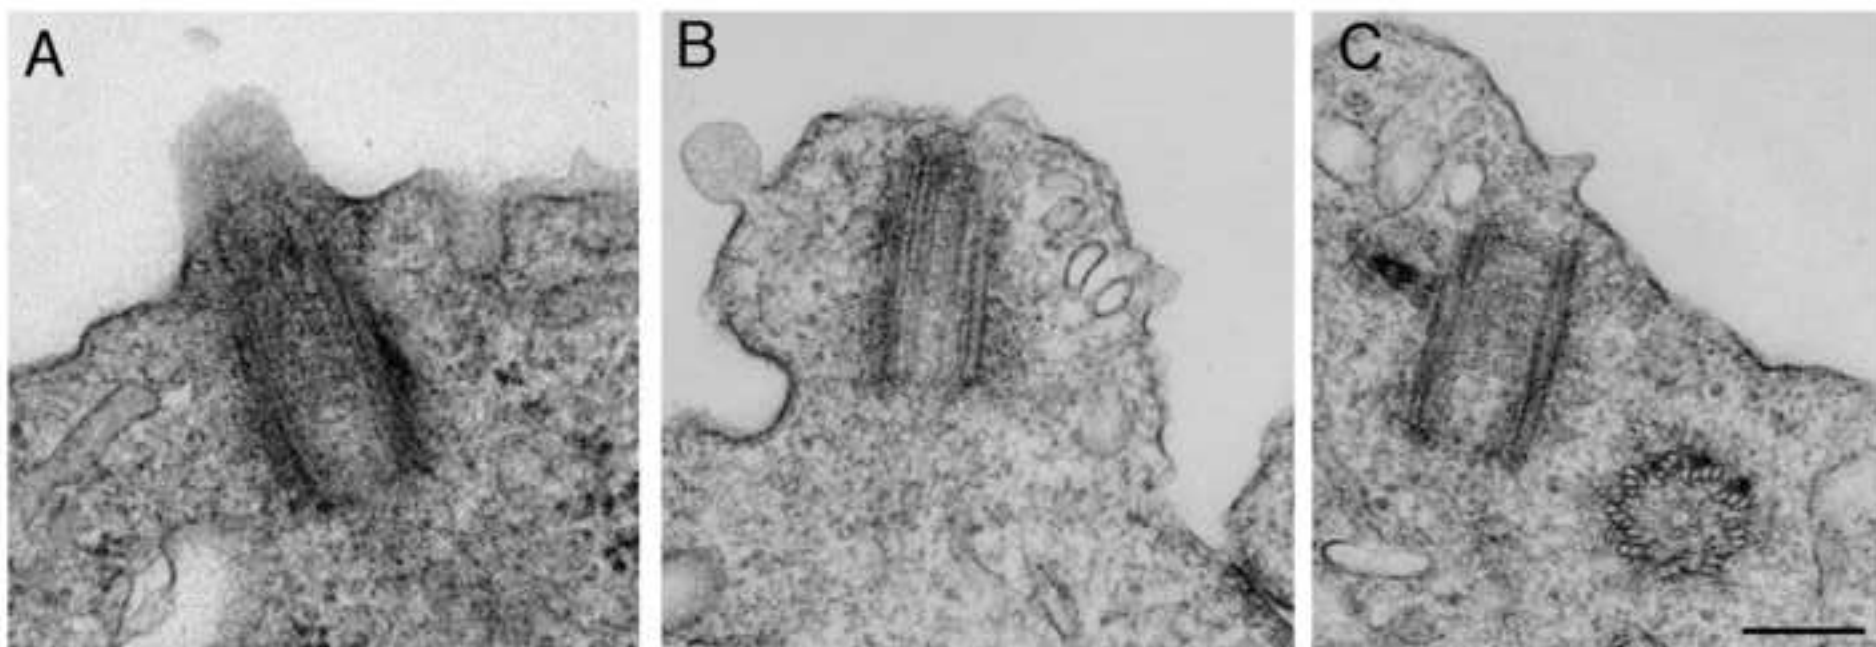

Fig. S3

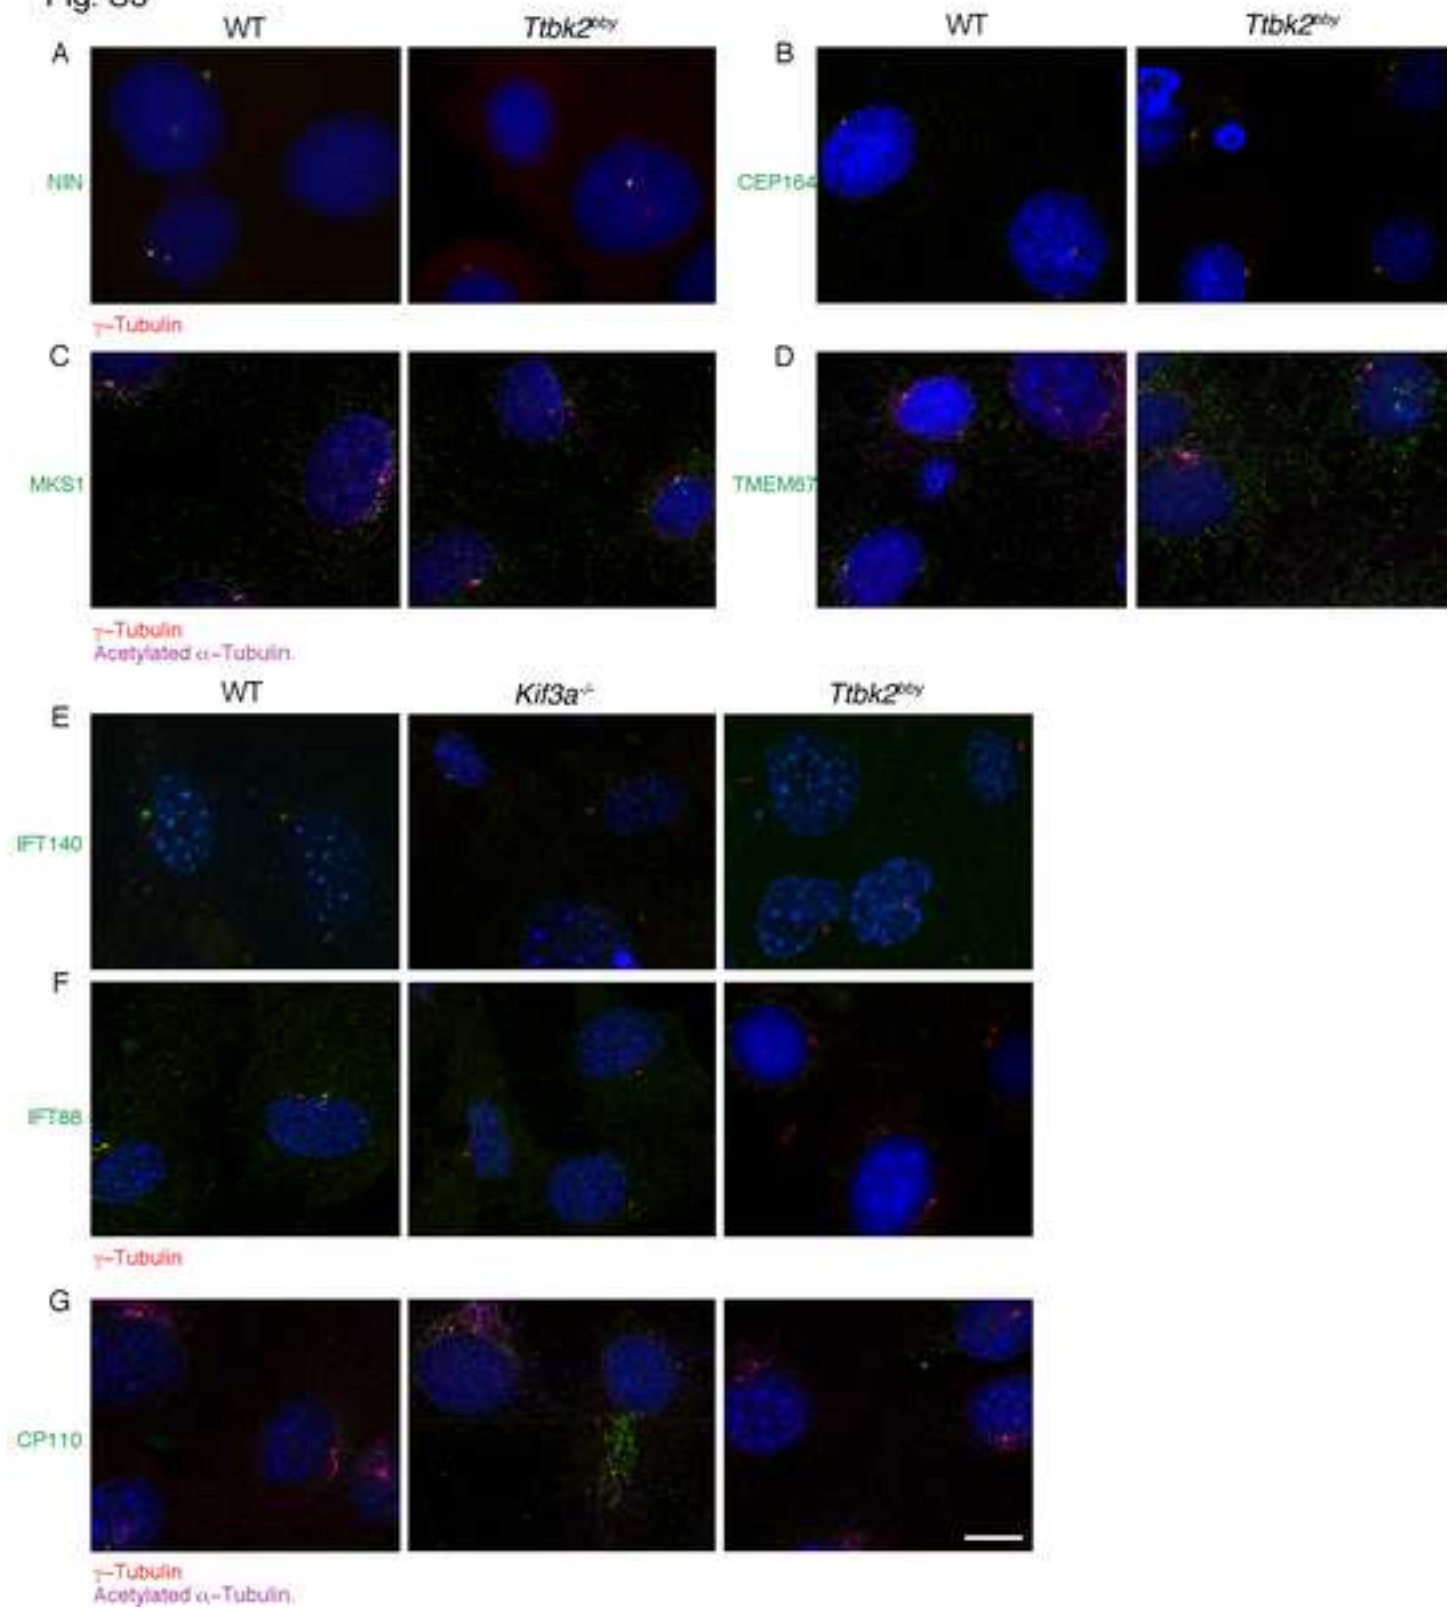

Fig. S4

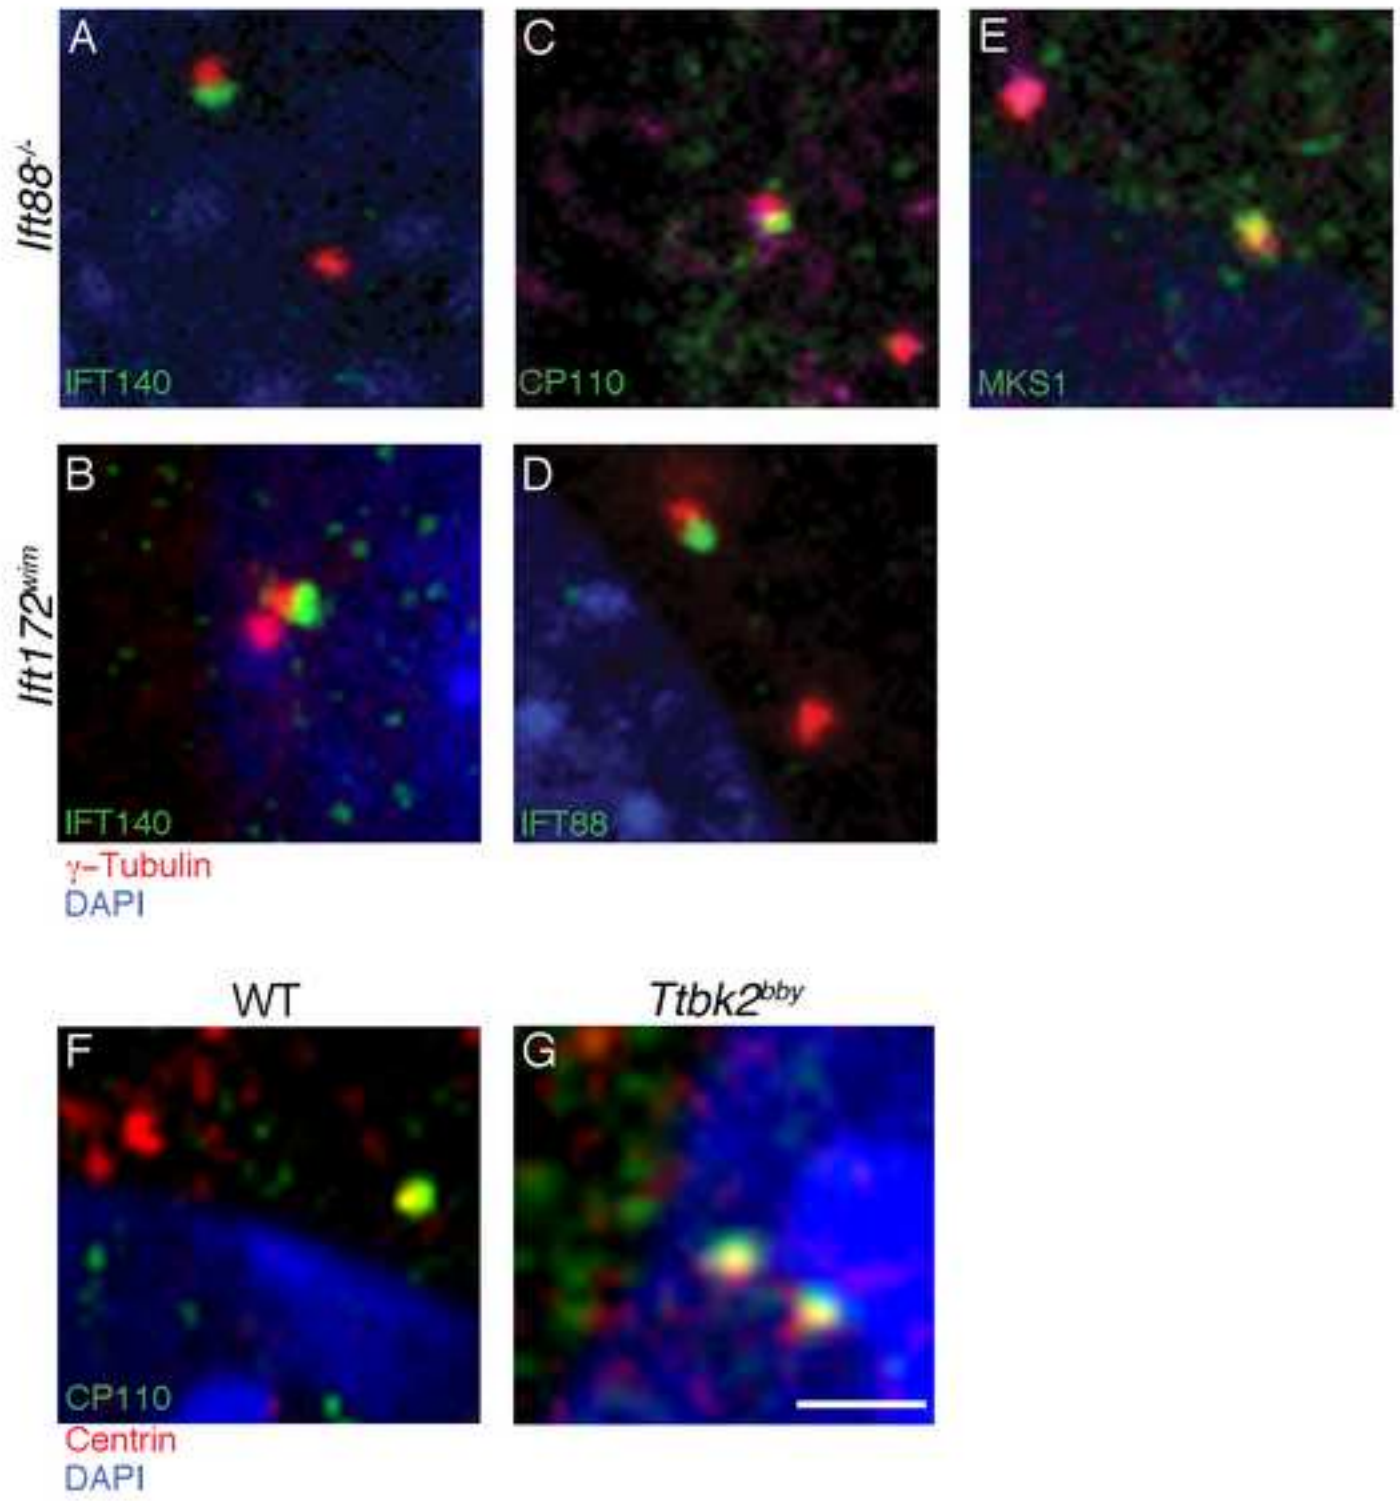

Fig. S5

A

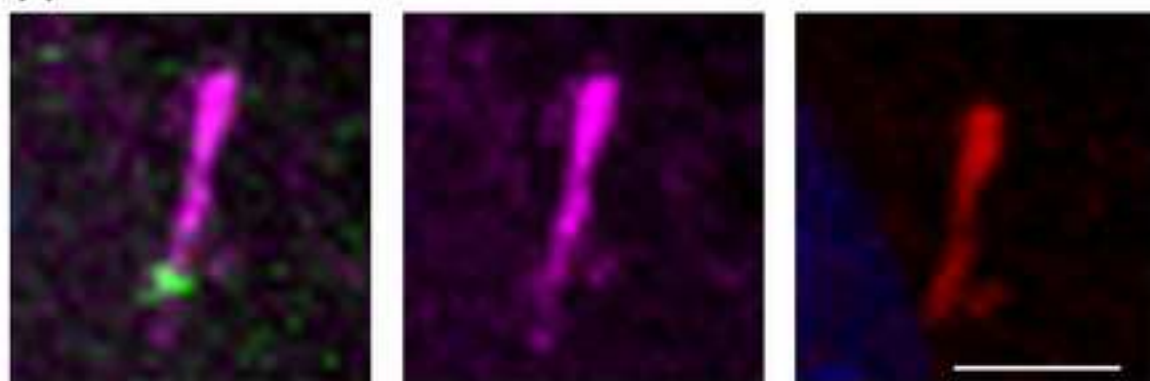

TTBK2::GFP  
Acetylated  $\alpha$ -Tubulin  
Arl13b

- Serum :

0 Hours

6 Hours

12 Hours

24 Hours

48 Hours

+ Serum:

6 Hours

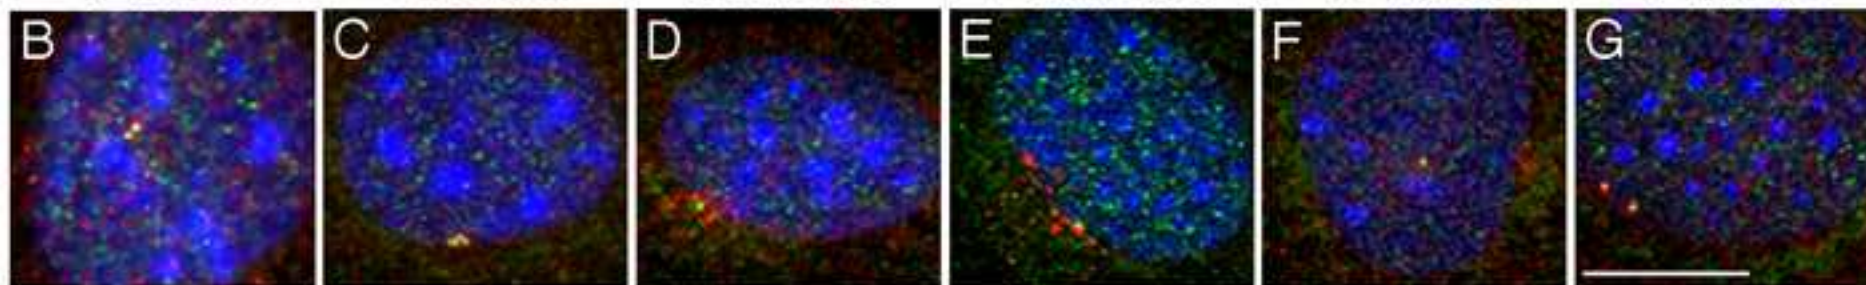

CP110  
Centrin



Fig. S6

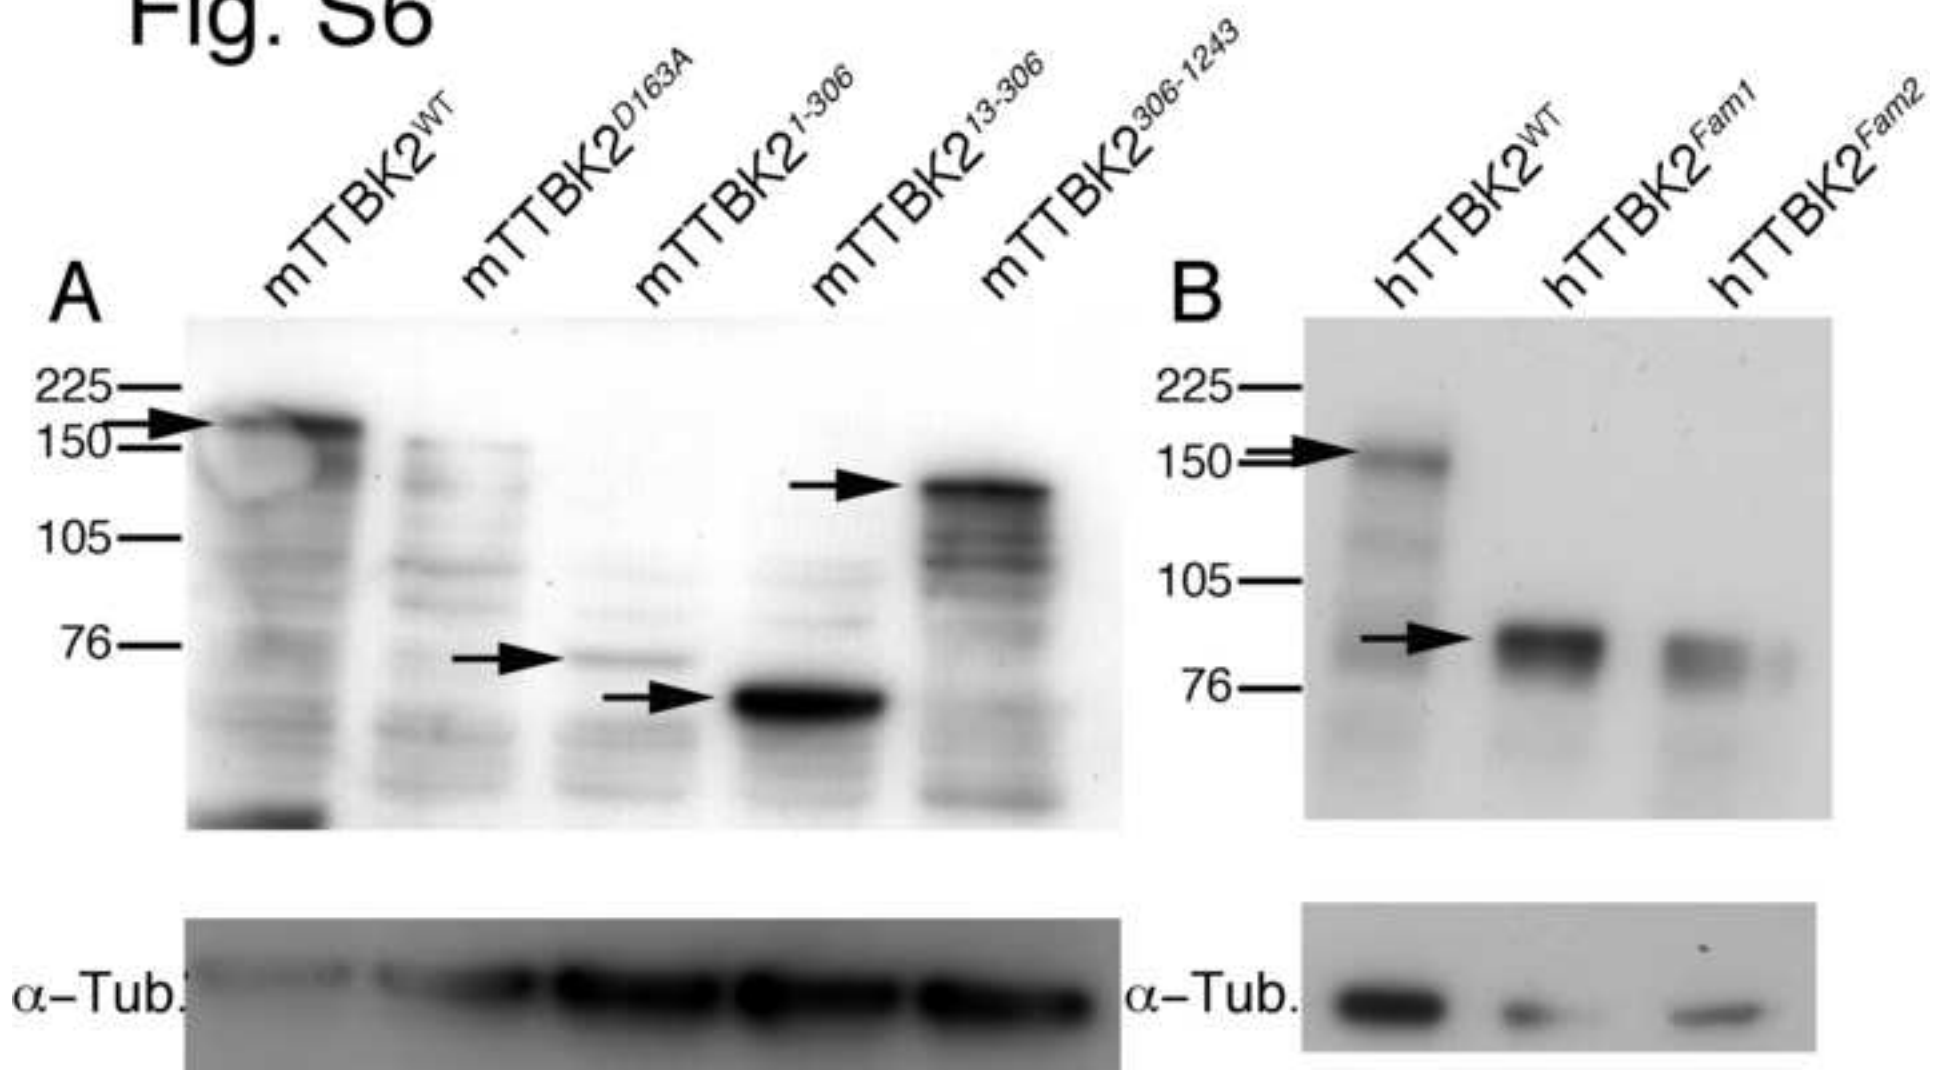

Supplement: NIHMS413848-supplement-02.pdf [file NIHMS413848-supplement-02.pdf]
